# Supplementary material
Source: Springer Nature journal article supplement (https://www.springermedizin.de/resource/supplementary/12916_2014_973_MOESM4_ESM.pdf/9598972)

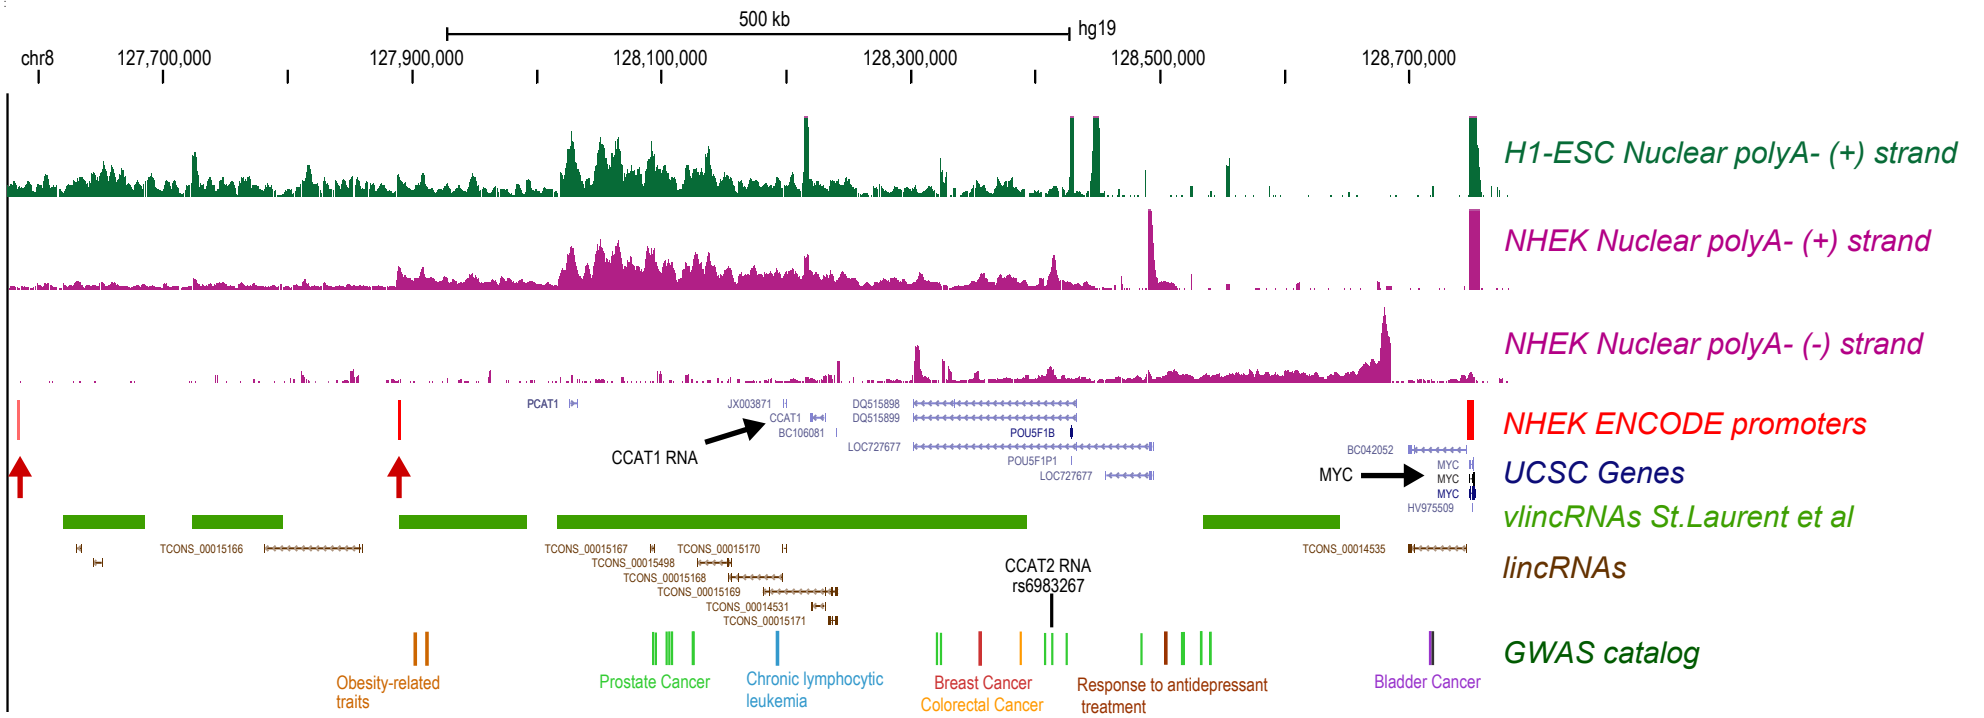

Figure 2

Supplement: MOESM4 [file 9598972]
